# Supplementary material for: Copper, zinc, and manganese niobates (CuNb2O6, ZnNb2O6, and MnNb2O6): structural characteristics, Li+ storage properties, and working mechanisms
Source: Royal Society of Chemistry journal article supplement (doi:10.1039/d0qi00475h), 2020-01-01
Supplement: d0qi00475h1.pdf [file d0qi00475h1.pdf]

## Supplementary Information

### **Copper, zinc, and manganese niobates ( $\text{CuNb}_2\text{O}_6$ , $\text{ZnNb}_2\text{O}_6$ , and $\text{MnNb}_2\text{O}_6$ ): structural characteristics, $\text{Li}^+$ storage properties, and working mechanisms**

*Sung-Yun Lee,<sup>a</sup> An Seop Lim,<sup>a</sup> Yong Min Kwon,<sup>a</sup> Kuk Young Cho<sup>\*b</sup> and Sukeun Yoon<sup>\*a</sup>*

<sup>a</sup> Division of Advanced Materials Engineering & Institute for Rare Metals, Kongju National University, Chungnam 31080, Republic of Korea

<sup>b</sup> Department of Materials Science and Chemical Engineering, Hanyang University, Gyeonggi 15588, Republic of Korea

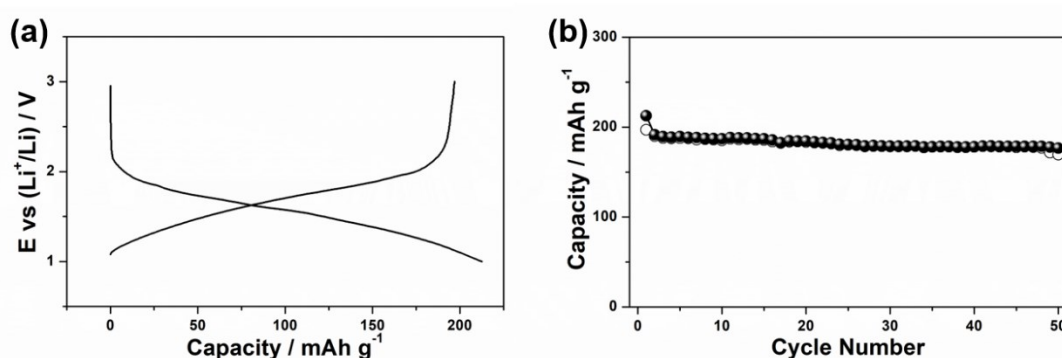

**Fig. S1** (a) Charge–discharge profile at the 1st cycle and (b) cycling performance of  $\text{Nb}_2\text{O}_5$  at current density of  $100 \text{ mA g}^{-1}$
